# Supplementary material
Source: PubMed Central journal article supplement (PMC2736022)
Supplement: supp_8_3_182__1.pdf [file supp_8_3_182__1.pdf]

**Appendix One.** The hierarchical level of each concept, its coverage in the pre-workshop version of the course (1=covered; 0=not covered), its coverage in the Spring 2008 version of the workshop course (1=covered; 0=not covered), and a description of each concept is listed in this appendix.

| Level           | Pre | Post | Concept                                                                                                                                                                                                                     |
|-----------------|-----|------|-----------------------------------------------------------------------------------------------------------------------------------------------------------------------------------------------------------------------------|
| 1 <sup>st</sup> | 1   | 1    | <b>Scientific knowledge</b> is based on the evaluation of tentative hypotheses through systematic observation of nature.                                                                                                    |
| 2 <sup>nd</sup> | 1   | 1    | <b>Hypotheses</b> are claims which can be scientifically tested, and potentially disproved.                                                                                                                                 |
| 3 <sup>rd</sup> | 1   | 1    | Exploration of initial observations and related knowledge contributes to <i>hypothesis generation</i> .                                                                                                                     |
| 3 <sup>rd</sup> | 1   | 1    | <i>Hypotheses-testing</i> includes using the hypothesis to generate a prediction, then making observations and comparing the prediction of the hypothesis to the observations.                                              |
| 3 <sup>rd</sup> | 1   | 1    | Hypotheses can be tested with <i>controlled experiments</i> which have independent and dependent variables or through <i>natural experiments</i> which do not include the controlled manipulation of independent variables. |
| 3 <sup>rd</sup> | 1   | 1    | Quantitative patterns in observed results are often illustrated with <i>graphs</i> .                                                                                                                                        |
| 4 <sup>th</sup> | 1   | 1    | All experiments make <i>assumptions</i> which may or may not be true.                                                                                                                                                       |
| 4 <sup>th</sup> | 1   | 1    | <i>Null hypotheses</i> can be disproved but not proved.                                                                                                                                                                     |
| 4 <sup>th</sup> | 1   | 1    | <i>Inferential statistics</i> estimate the probability that the variation between the observations and prediction are simply due to chance.                                                                                 |
| 4 <sup>th</sup> | 1   | 1    | <i>Model systems</i> are often used in controlled experiments.                                                                                                                                                              |
| 4 <sup>th</sup> | 0   | 1    | Some hypotheses are represented with <i>mathematical models</i> .                                                                                                                                                           |
| 2 <sup>nd</sup> | 1   | 1    | The <b>level of acceptance</b> of hypotheses varies greatly as a result of the number and quality of tests of the hypothesis that have supported it.                                                                        |
| 2 <sup>nd</sup> | 1   | 1    | <b>Scientific facts</b> are observations or hypotheses that have been supported so many times that they are assumed to be true.                                                                                             |
| 3 <sup>rd</sup> | 1   | 1    | Examples of scientific facts: cells exist; genes are coded into the structure of DNA; evolution happens.                                                                                                                    |
| 2 <sup>nd</sup> | 1   | 1    | <b>Theories</b> are major concepts which link together many observations and hypotheses.                                                                                                                                    |
| 1 <sup>st</sup> | 1   | 1    | <b>Evolution</b> is the change in the frequency of heritable traits of a population across generations.                                                                                                                     |
| 2 <sup>nd</sup> |     |      | <b>Natural selection</b> can result in adaptive evolution.                                                                                                                                                                  |
| 3 <sup>rd</sup> | 1   | 1    | Natural selection is <i>differential survival</i> of individuals within a population based on a variation in trait.                                                                                                         |
| 4 <sup>th</sup> | 1   | 1    | Natural selection is an interaction between individuals and their environment.                                                                                                                                              |
| 3 <sup>rd</sup> | 1   | 1    | Natural selection results in evolution if the selected trait is <i>heritable</i> .                                                                                                                                          |
| 3 <sup>rd</sup> | 1   | 1    | <i>Populations not individuals</i> evolve.                                                                                                                                                                                  |
| 3 <sup>rd</sup> | 1   | 1    | Evolution cannot occur unless there is <i>heritable variation</i> for the trait in the population.                                                                                                                          |
| 4 <sup>th</sup> | 1   | 0    | Natural selection can result in <i>directional, stabilizing, or disruptive</i>                                                                                                                                              |

|                 |   |   |                                                                                                                                                                             |
|-----------------|---|---|-----------------------------------------------------------------------------------------------------------------------------------------------------------------------------|
|                 |   |   | changes in phenotypes.                                                                                                                                                      |
| 4 <sup>th</sup> | 1 | 1 | Natural selection <i>against a dominant allele</i> can result in rapid fixation of the recessive.                                                                           |
| 4 <sup>th</sup> | 1 | 1 | Natural selection <i>against a recessive allele</i> does not result in fixation.                                                                                            |
| 4 <sup>th</sup> | 1 | 1 | Natural selection <i>favoring heterozygous</i> genotypes maintains a balance of the frequency of alleles in the population and maintains genetic diversity.                 |
| 2 <sup>nd</sup> | 1 | 1 | <b>Genetic Drift</b> is a random pattern of evolution due to bottlenecks and founder effects.                                                                               |
| 3 <sup>rd</sup> | 1 | 1 | <i>Genetic drift</i> is due to random sampling error of a trait in association with mortality or dispersal.                                                                 |
| 3 <sup>rd</sup> | 1 | 1 | <i>Genetic (or demographic) Bottlenecks</i> are random mortality relative to a trait.                                                                                       |
| 3 <sup>rd</sup> | 1 | 1 | <i>Founder effects</i> are random dispersal relative to a trait.                                                                                                            |
| 3 <sup>rd</sup> | 1 | 1 | Genetic drift reduces <i>genetic diversity</i> .                                                                                                                            |
| 3 <sup>rd</sup> | 1 | 1 | Reduced genetic diversity can result in <i>inbreeding depression</i> .                                                                                                      |
| 4 <sup>th</sup> | 1 | 1 | Genetic drift and inbreeding depression are problems for <i>endangered species</i> .                                                                                        |
| 2 <sup>nd</sup> | 1 | 1 | <b>Sexual selection</b> is due to differences in fitness due to variation in traits which influence mating success.                                                         |
| 3 <sup>rd</sup> | 1 | 1 | <i>Sexually dimorphic</i> traits are more pronounced in the sex which invests less energy in producing gametes and caring for offspring (typically males).                  |
| 4 <sup>th</sup> | 1 | 1 | Sexually dimorphic traits function as <i>armaments</i> and/or <i>ornaments</i> .                                                                                            |
| 3 <sup>rd</sup> | 1 | 1 | Mate choice can be influenced by pre-existing sensory bias, non-genetic benefits to offspring or female, genetic benefits to offspring.                                     |
| 2 <sup>nd</sup> | 1 | 1 | <b>Speciation</b> occurs when gene flow between diverging populations is blocked.                                                                                           |
| 3 <sup>rd</sup> | 1 | 1 | <i>Microevolutionary processes</i> (natural selection, genetic drift, mutation, gene flow) contribute to speciation.                                                        |
| 4 <sup>th</sup> | 1 | 1 | Secondary contact <i>reinforces</i> speciation if hybrids are less fit.                                                                                                     |
| 3 <sup>rd</sup> | 1 | 1 | Speciation can occur <i>rapidly or slowly</i> .                                                                                                                             |
| 3 <sup>rd</sup> | 1 | 1 | <i>Adaptive Radiations</i> are characterized by relatively rapid speciation and diversification within a taxa.                                                              |
| 4 <sup>th</sup> | 1 | 1 | Adaptive radiations are triggered by <i>opportunities</i> resulting from environmental or genetic change.                                                                   |
| 4 <sup>th</sup> | 1 | 1 | Heritable variation associated with adaptive radiations is often associated with <i>regulatory genes</i> .                                                                  |
| 2 <sup>nd</sup> | 1 | 1 | <b>Extinction</b> is the permanent loss of a species.                                                                                                                       |
| 3 <sup>rd</sup> | 1 | 1 | Mass extinctions are times of widespread and relatively rapid extinction rates.                                                                                             |
| 4 <sup>th</sup> | 1 | 1 | The <i>K-T mass extinction</i> resulted in reduced dominance of reptiles and gymnosperms and triggered the adaptive radiations of angiosperms, insects, birds, and mammals. |
| 4 <sup>th</sup> | 1 | 1 | The K-T mass extinction was due to an <i>asteroid</i> impact.                                                                                                               |
| 4 <sup>th</sup> | 0 | 0 | Some mass extinctions may have been influenced by the effects of the arrangement of <i>continental plates on climate</i> .                                                  |
| 4 <sup>th</sup> | 0 | 0 | We are entering a mass extinction due to climate change, habitat                                                                                                            |

|                 |   |   |                                                                                                                                                                     |
|-----------------|---|---|---------------------------------------------------------------------------------------------------------------------------------------------------------------------|
|                 |   |   | destruction, and invasive species.                                                                                                                                  |
| 1 <sup>st</sup> | 1 | 1 | <b>Biodiversity</b> is a result of historic patterns of speciation and extinction                                                                                   |
| 2 <sup>nd</sup> | 1 | 1 | <b>Phylogenies</b> are hypotheses about speciation and extinction within a taxa.                                                                                    |
| 3 <sup>rd</sup> | 1 | 1 | <i>Domains</i> indicate that 2/3 of the diversity of life is prokaryotic.                                                                                           |
| 4 <sup>th</sup> | 1 | 1 | The wide range of habitats colonized by <i>prokaryotes</i> is associated with their <i>diverse metabolism</i> .                                                     |
| 3 <sup>rd</sup> | 1 | 1 | The phylogenetic history of <i>plants</i> is associated with adaptation to terrestrial environments.                                                                |
| 4 <sup>th</sup> | 1 | 0 | The fundamental life history difference between plants and animals is mitotic growth during the haploid stage of plant life cycles to produce <i>gametophytes</i> . |
| 3 <sup>rd</sup> | 1 | 1 | <i>Fungi</i> are more closely related to <i>animals</i> than to plants.                                                                                             |
| 4 <sup>th</sup> | 1 | 0 | Fungi differ from animals in that they secrete enzymes, <i>externally digest</i> molecules including cellulose, and then absorb the nutrients.                      |
| 3 <sup>rd</sup> | 1 | 1 | <i>Animal Phyla</i> are associated with morphological, mobility, & perceptual adaptations                                                                           |
| 4 <sup>th</sup> | 1 | 1 | Exo- and endo-skeletons enable precise muscle control of appendages                                                                                                 |
| 4 <sup>th</sup> | 1 | 1 | Insect pollinators & herbivores co-evolved with angiosperms                                                                                                         |
| 1 <sup>st</sup> | 1 | 1 | Phenotypes are determined by <b>genotypes</b> and the <b>environment</b> .                                                                                          |
| 2 <sup>nd</sup> | 1 | 1 | Genes are <b>discrete units</b> on information passed unchanged, except for rare mutations, from parents to offspring.                                              |
| 2 <sup>nd</sup> | 1 | 1 | The genetic code is a result of the structure of <b>DNA</b> within chromosomes.                                                                                     |
| 2 <sup>nd</sup> | 1 | 1 | <b>Alleles</b> are versions of genes.                                                                                                                               |
| 3 <sup>rd</sup> | 1 | 1 | <b>Mutation</b> produces new alleles.                                                                                                                               |
| 4 <sup>th</sup> | 1 | 1 | Mutations can occur at many levels: point mutations, chromosomal rearrangements, and changes in ploidy.                                                             |
| 2 <sup>nd</sup> | 1 | 1 | <b>Genotypes</b> describe an individual's alleles.                                                                                                                  |
| 2 <sup>nd</sup> | 1 | 1 | <b>Phenotypes</b> describe observable traits of individuals.                                                                                                        |
| 2 <sup>nd</sup> | 1 | 1 | Meiosis, fertilization, and gene expression underlie <b>Mendelian patterns of inheritance</b> .                                                                     |
| 3 <sup>rd</sup> | 1 | 1 | Somatic cells are <i>diploid</i> .                                                                                                                                  |
| 3 <sup>rd</sup> | 1 | 1 | <i>Meiosis</i> randomly separates homologs into haploid gametes.                                                                                                    |
| 3 <sup>rd</sup> | 1 | 1 | Genes on nonhomologous chromosomes <i>sort independently</i> resulting in genetic variation among gametes.                                                          |
| 3 <sup>rd</sup> | 1 | 1 | <i>Crossing over</i> increases genetic variation by rearranging alleles of genes between homologs.                                                                  |
| 3 <sup>rd</sup> | 1 | 1 | <i>Fertilization</i> combines haploid gamete genotypes into diploid zygotes.                                                                                        |
| 3 <sup>rd</sup> | 1 | 1 | <i>Dominance relationships</i> describe the phenotypic expression of heterozygotes.                                                                                 |
| 4 <sup>th</sup> | 1 | 1 | <i>Pleiotropic</i> genes influence more than one phenotypic trait.                                                                                                  |
| 4 <sup>th</sup> | 1 | 1 | <i>Epistatic</i> interactions between gene products influence the expression of genotypes into phenotypes.                                                          |
| 3 <sup>rd</sup> | 1 | 1 | <i>Quantitative traits</i> are influenced by polygenic genes.                                                                                                       |
| 3 <sup>rd</sup> | 1 | 1 | In humans, X-linked genes are hemizygous in males.                                                                                                                  |
| 4 <sup>th</sup> | 1 | 1 | Males inherit these genes from their mothers.                                                                                                                       |

|                 |   |   |                                                                                                                                                                                                                                     |
|-----------------|---|---|-------------------------------------------------------------------------------------------------------------------------------------------------------------------------------------------------------------------------------------|
| 4 <sup>th</sup> | 1 | 1 | Multiplicative probability describes the increased expression of recessive X-linked genes in males.                                                                                                                                 |
| 2 <sup>nd</sup> | 1 | 1 | While mutation is the ultimate source of new alleles, <b>recombination</b> produces new combinations of alleles.                                                                                                                    |
| 3 <sup>rd</sup> | 1 | 1 | In <i>eukaryotes</i> , crossing over, independent assortment, and fertilization contribute to recombination.                                                                                                                        |
| 3 <sup>rd</sup> | 1 | 1 | In <i>prokaryotes</i> , horizontal gene transfer results in recombination.                                                                                                                                                          |
| 1 <sup>st</sup> | 1 | 0 | <b>Behavioral</b> traits evolve in response to <b>natural selection</b> .                                                                                                                                                           |
| 2 <sup>nd</sup> | 1 | 0 | Behavior is a <b>response</b> to a <b>stimulus</b> .                                                                                                                                                                                |
| 2 <sup>nd</sup> | 1 | 0 | Behaviors range from innate fixed action patterns to complex learned behaviors.                                                                                                                                                     |
| 2 <sup>nd</sup> | 1 | 0 | Behaviors can be learned through a variety of processes (e.g. operant, habituation, classical conditioning, imprinting).                                                                                                            |
| 1 <sup>st</sup> | 1 | 1 | <b>Populations</b> have dynamic spatial and temporal structures.                                                                                                                                                                    |
| 2 <sup>nd</sup> | 1 | 1 | <b>Population's characteristics</b> are estimated with a variety of <b>sampling</b> techniques.                                                                                                                                     |
| 2 <sup>nd</sup> | 1 | 0 | The <b>spatial boundaries</b> of populations are influenced by abiotic factors, as well as species interactions; both of these factors change through time.                                                                         |
| 3 <sup>rd</sup> | 1 | 1 | <i>Invasive species</i> have moved out of their native region and are disturbing natural and human communities.                                                                                                                     |
| 2 <sup>nd</sup> | 1 | 1 | <b>Population size</b> and density varies through time.                                                                                                                                                                             |
| 3 <sup>rd</sup> | 1 | 1 | Populations with a constant and positive per capita growth rate grow <b>exponentially</b> .                                                                                                                                         |
| 4 <sup>th</sup> | 1 | 1 | All species have a positive <i>biotic potential</i> .                                                                                                                                                                               |
| 4 <sup>th</sup> | 1 | 1 | <i>Birth rate, death rate, and migration</i> determine <i>r</i> .                                                                                                                                                                   |
| 4 <sup>th</sup> | 1 | 1 | Birth rate is determined by <i>fecundity and age structure</i> .                                                                                                                                                                    |
| 4 <sup>th</sup> | 1 | 1 | Death rate is determined by <i>life span and age structure</i> .                                                                                                                                                                    |
| 4 <sup>th</sup> | 1 | 1 | Age structure causes <i>demographic momentum</i> .                                                                                                                                                                                  |
| 3 <sup>rd</sup> | 1 | 1 | <i>Density-dependent mortality</i> can regulate <i>N</i> at <i>K</i> .                                                                                                                                                              |
| 3 <sup>rd</sup> | 1 | 1 | The <i>global human metapopulation</i> has increased global <i>K</i> , reduced <i>d</i> through agricultural, medicinal, and scientific innovations, and reduced <i>b</i> through birth control but is still growing exponentially. |
| 1 <sup>st</sup> | 1 | 1 | <b>Species interactions</b> influence the evolution of traits, population growth, and community structure.                                                                                                                          |
| 2 <sup>nd</sup> | 1 | 1 | <b>Parasitism, predation, and herbivory</b> are + -.                                                                                                                                                                                |
| 2 <sup>nd</sup> | 1 | 1 | <b>Competition</b> is - -.                                                                                                                                                                                                          |
| 3 <sup>rd</sup> | 1 | 1 | <i>Intraspecific competition</i> results in density-dependent mortality and contributes to <i>K</i> .                                                                                                                               |
| 3 <sup>rd</sup> | 1 | 1 | Strong intraspecific competition can contribute to <i>coexistence</i> .                                                                                                                                                             |
| 3 <sup>rd</sup> | 1 | 1 | Interspecific competition can result in <i>competitive exclusion, niche differentiation, and habitat partitioning</i> .                                                                                                             |
| 3 <sup>rd</sup> | 1 | 1 | Inter- and intra-specific competition can occur through <i>exploitation or interference</i> .                                                                                                                                       |
| 3 <sup>rd</sup> | 1 | 1 | <i>keystone predators</i> can reduce interspecific competition and increase species diversity of prey species.                                                                                                                      |
| 2 <sup>nd</sup> | 1 | 1 | <b>Mutualism</b> is + +.                                                                                                                                                                                                            |
| 3 <sup>rd</sup> | 1 | 1 | Mutualism can promote <i>coexistence</i> and expand niches.                                                                                                                                                                         |
| 1 <sup>st</sup> | 1 | 1 | <b>Communities</b> change in response to biotic and abiotic factors.                                                                                                                                                                |
| 2 <sup>nd</sup> | 1 | 1 | <i>Primary succession</i> initially favors species with high dispersal and                                                                                                                                                          |

|                 |   |   |                                                                                                                             |
|-----------------|---|---|-----------------------------------------------------------------------------------------------------------------------------|
|                 |   |   | tolerance.                                                                                                                  |
| 2 <sup>nd</sup> | 1 | 1 | <i>Secondary succession</i> is promoted by facilitation; slowed by inhibition.                                              |
| 3 <sup>rd</sup> | 1 | 1 | <i>Intermediate disturbance</i> can increase species diversity and productivity                                             |
| 2 <sup>nd</sup> | 1 | 1 | <i>Species diversity</i> increases with decreasing <i>latitude</i> .                                                        |
| 1 <sup>st</sup> | 1 | 1 | Energy flows through <b>ecosystems</b> ; nutrients cycle within ecosystems.                                                 |
| 2 <sup>nd</sup> | 1 | 1 | Atmospheric <b>nitrogen</b> is common, but nitrogen is often <i>limiting</i> .                                              |
| 3 <sup>rd</sup> | 1 | 1 | Nitrogen fixation, nitrification, and denitrification depend on <i>bacteria</i> .                                           |
| 2 <sup>nd</sup> | 1 | 1 | <b>Photosynthesis &amp; cellular respiration</b> are important components of energy flow and carbon cycling.                |
| 3 <sup>rd</sup> | 1 | 1 | Deforestation and burning fossil fuels influence carbon cycling, energy flow, and result in climate change.                 |
| 4 <sup>th</sup> | 1 | 1 | There are direct and indirect measures of increasing atmospheric carbon dioxide.                                            |
| 4 <sup>th</sup> | 1 | 1 | There is theoretical and empirical evidence of the link between carbon dioxide and climate change.                          |
| 4 <sup>th</sup> | 1 | 1 | Climate change, along with invasive species and habitat destruction, is resulting in the disruption of natural communities. |

---
